# Supplementary material
Source: Springer Nature journal article supplement (https://www.springermedizin.de/resource/supplementary/13256_2011_1889_MOESM4_ESM.pdf/9648658)

SK

LIVER

PORTAL

+ 23.1

-5

-10

- 23.1

cm/s

-15

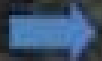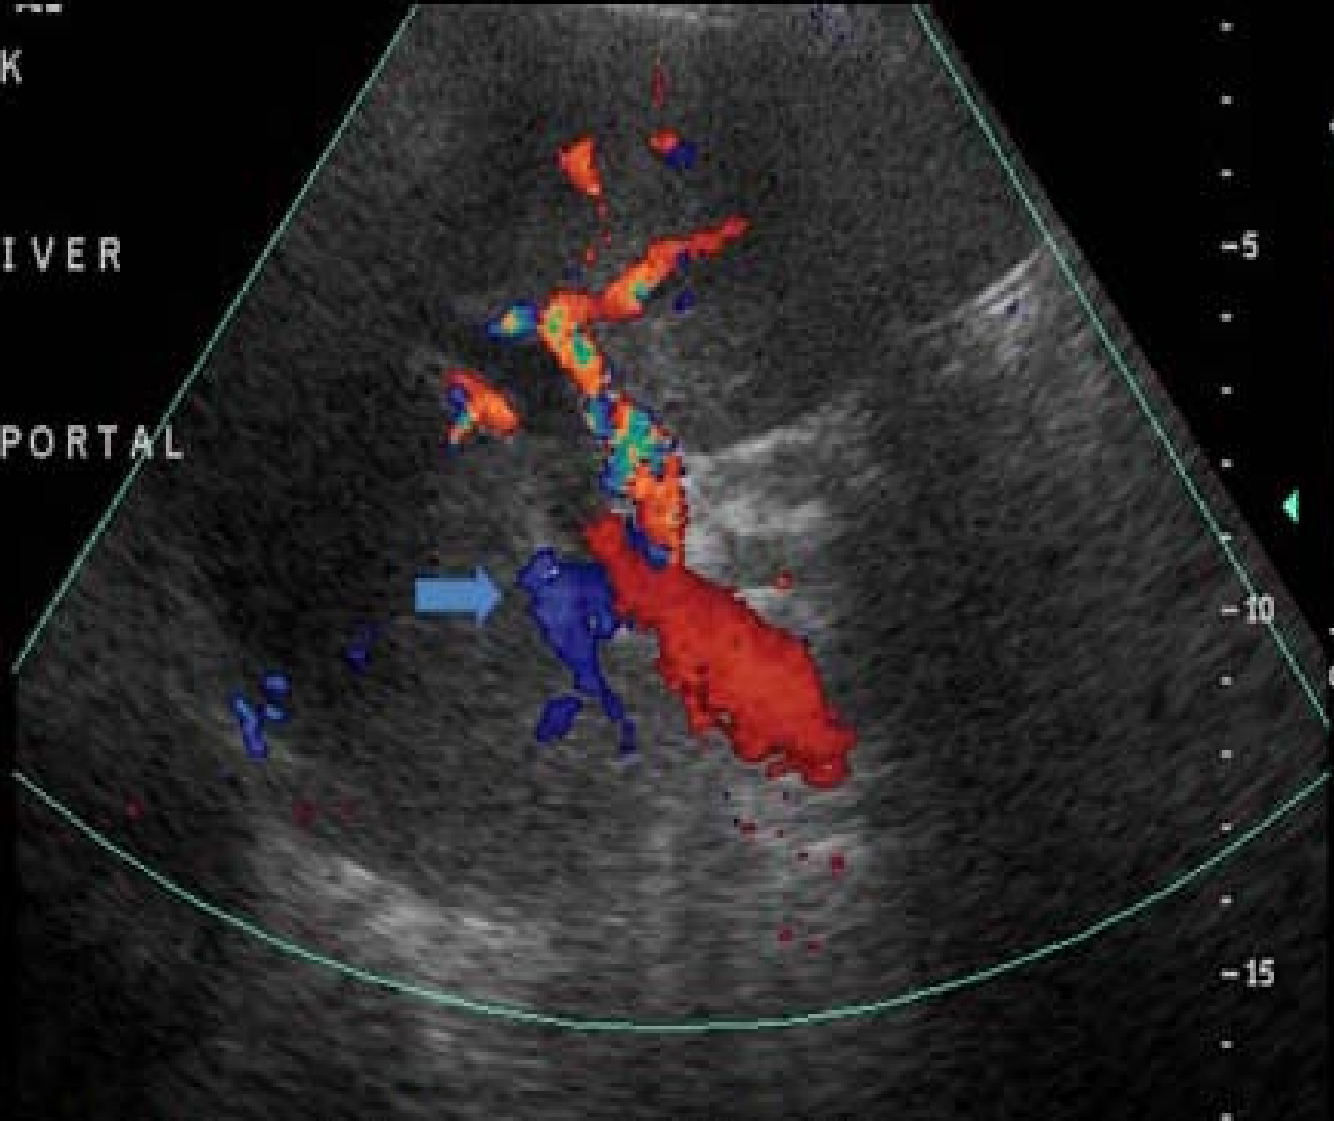

Supplement: MOESM4 [file 9648658]
